# Supplementary material
Source: PubMed Central journal article supplement (PMC6462239)

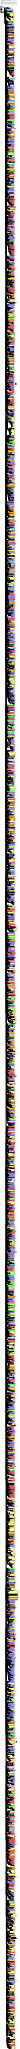

Supplement: NIHMS1017877-supplement-Supp_figS2.pdf [file NIHMS1017877-supplement-Supp_figS2.pdf]
